# Supplementary material
Source: publisher figshare collection journal article supplement (https://tandf.figshare.com/ndownloader/files/13255955)
Supplement: Supplementary file 1 [file 13255955]

1. The primers used in RT-PCR were listed as follows:

GAPDH-F: TCC ATG ACA TTG GTA TCG

GAPDH-R: TGT AGC CAA ATT CGT TGT CA

NANOG-F: GAA CTC TCC AAC ATC CTG AAC CT

NANOG-R: TCT GCG TCA CAC CAT TGC TAT

SOX2-F: GGG AAA TGG GAG GGG TGC AAA AGA

SOX2-R: TTG CGT GAG TGT GGA TGG GAT TGG

OCT4-F: GGA AGG TAT TCA GCC AAA CGA CCA

OCT4-R: CTC ACT CGG TTC TCG ATA CTG GTT

AhR-F: ACA TCA CCT ACG CCA GTC GC

AhR-R: TCT ATG CCG CTT GGA AGG AT

CYP1A1-F: CTA TCT GGG CTG TGG GCA A

CYP1A1-R: CTG GCT CAA GCA CAA CTT GG

ABCG2-F: GCA ACA TGT ACT GGC GAA GA

ABCG2-R: CAG GTA GGC AAT TGT GAG GAA

2. Luciferase assays were performed using mutant ABCG2 promoter.


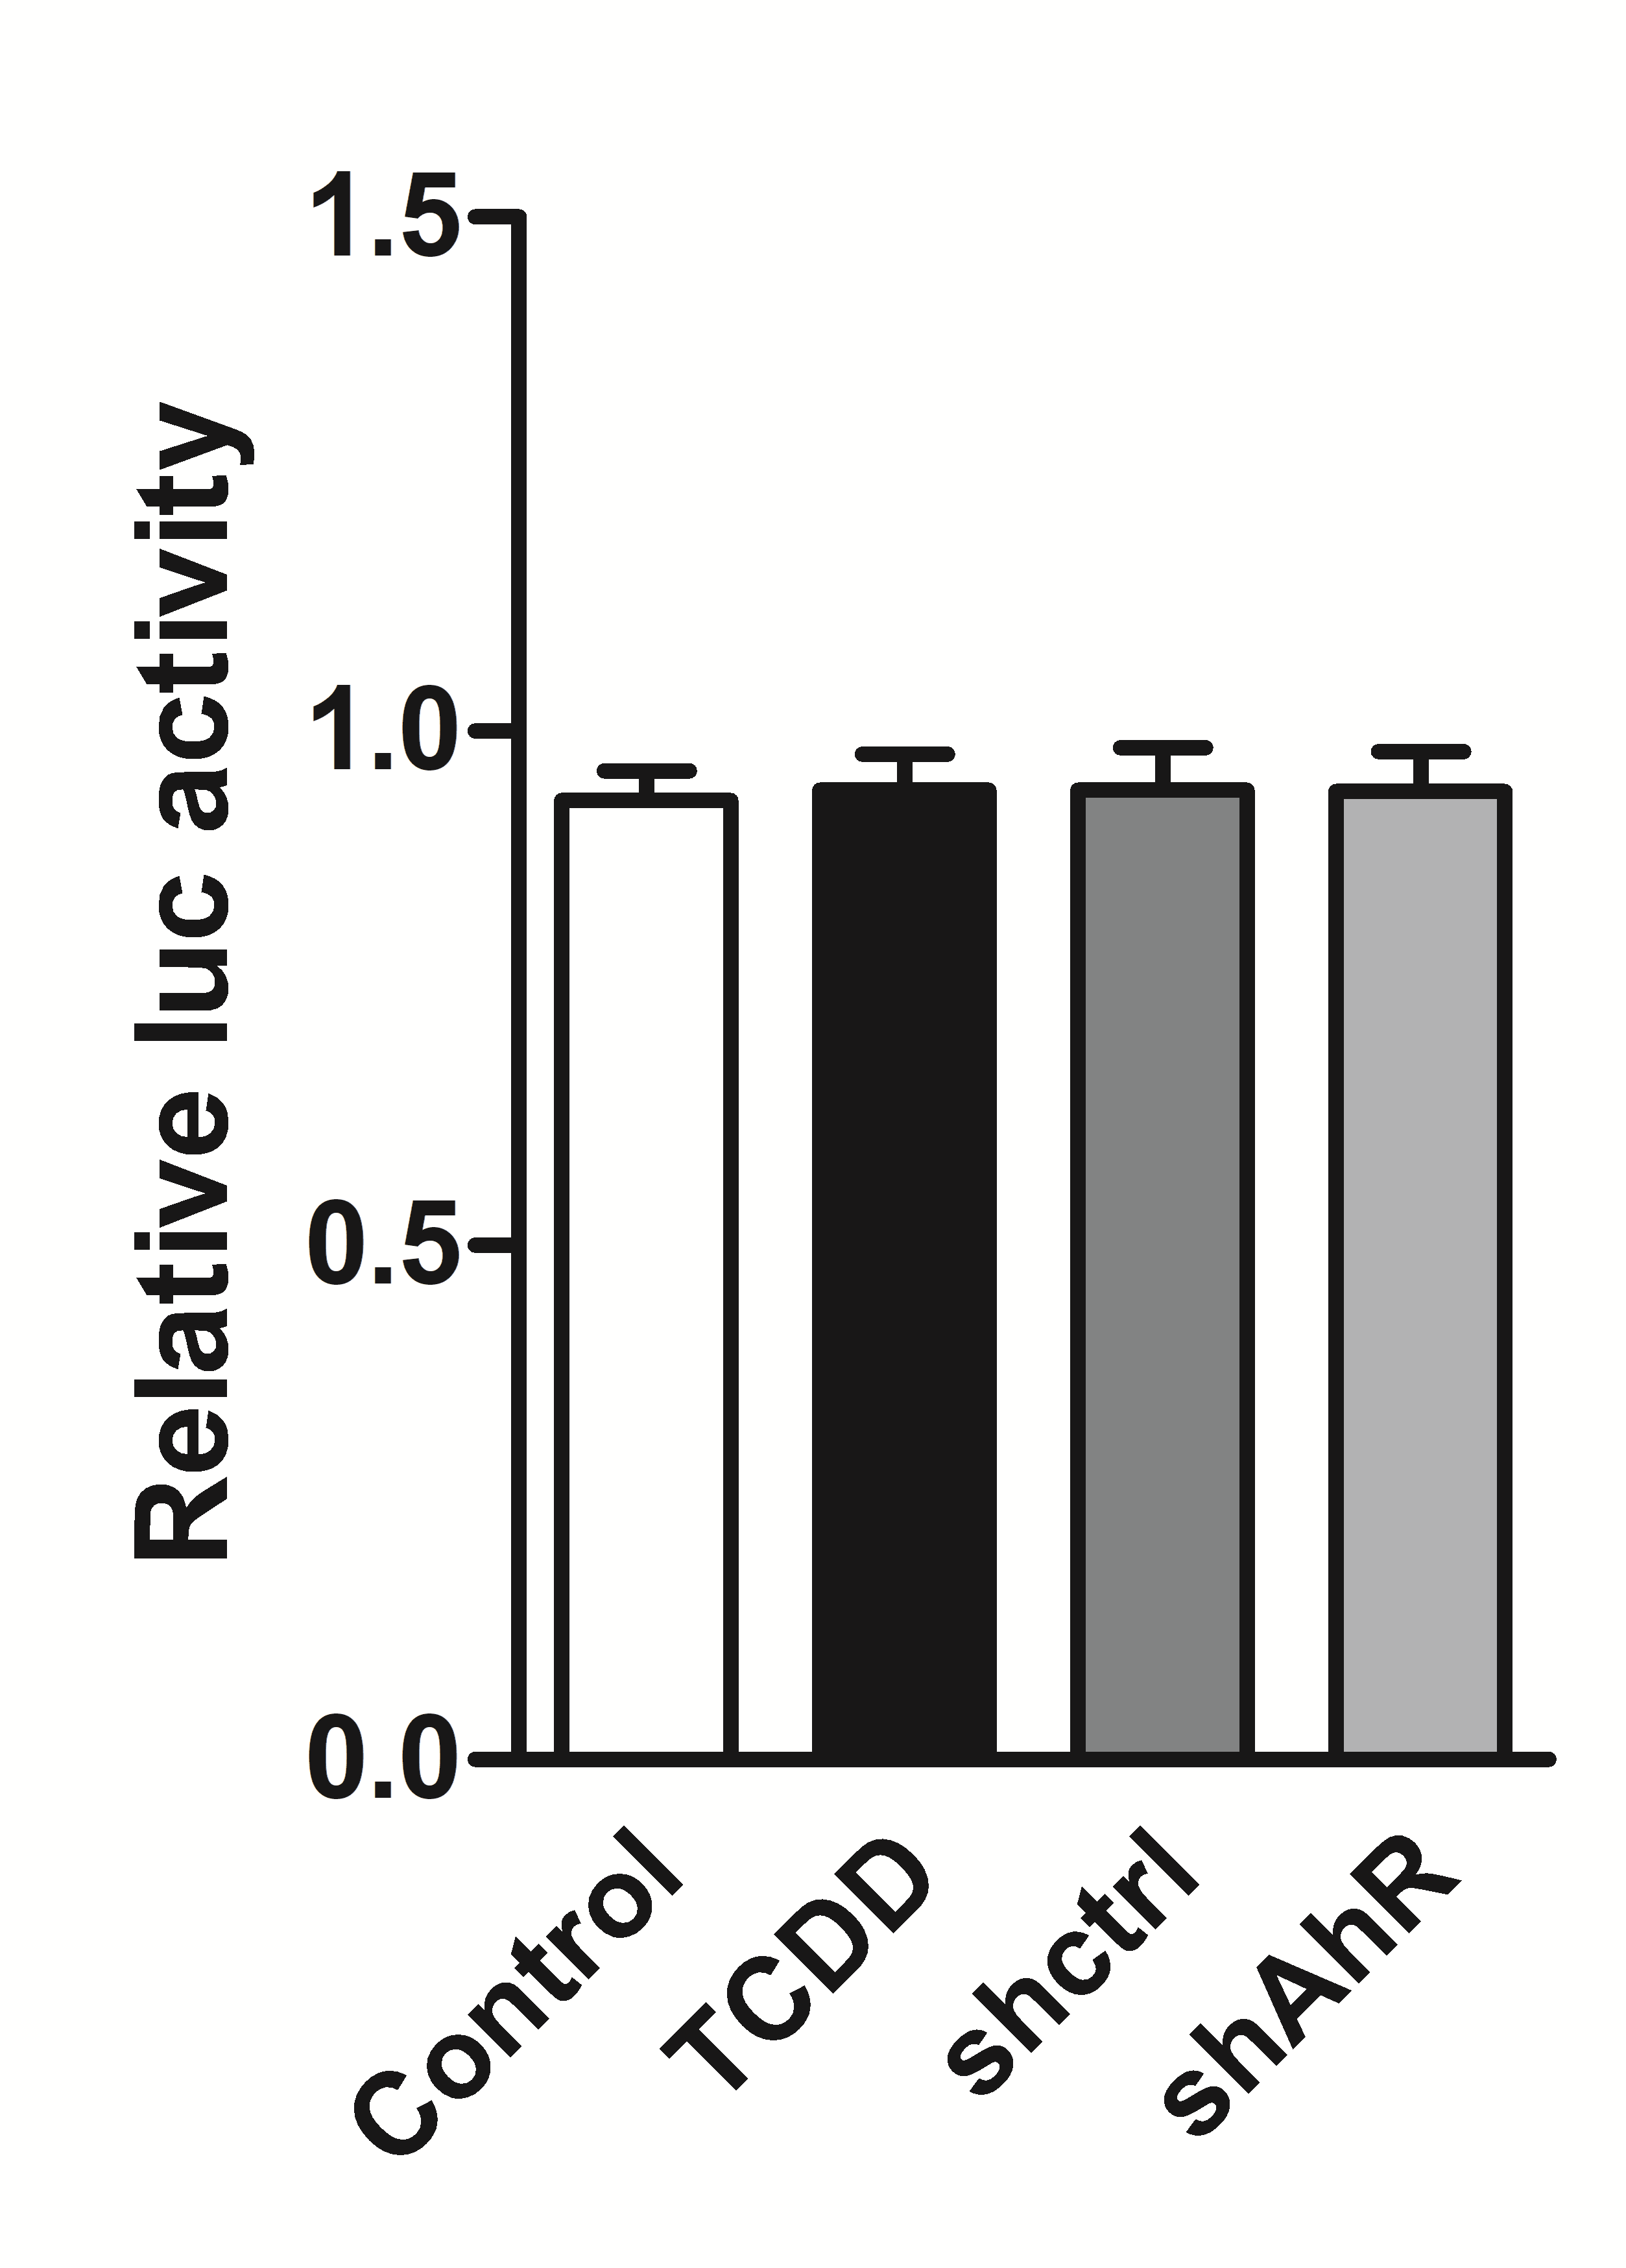


3. The primers used in ChIP-PCR were listed:

P1-F: GTC CCT GCG TGT CAC GGC AGG GTG

P1-R: GTG AGG CGT GGC CCC GAC TGC CGG

P2-F: CGA ACG GAA TGA ACC AGA GT

P2-R: ATC CCA TTC ACC AGA ACC A
